# Supplementary material for: Inulin-Type Fructan Supplementation of 3- to 6-Year-Old Children Is Associated with Higher Fecal Bifidobacterium Concentrations and Fewer Febrile Episodes Requiring Medical Attention
Source: PubMed Central journal article supplement (PMC6074834; doi:10.1093/jn/nxy120), 2018-07-03
Supplement: nxy120_supplemental_file.pdf [file nxy120_supplemental_file.pdf]

## Supplementary data

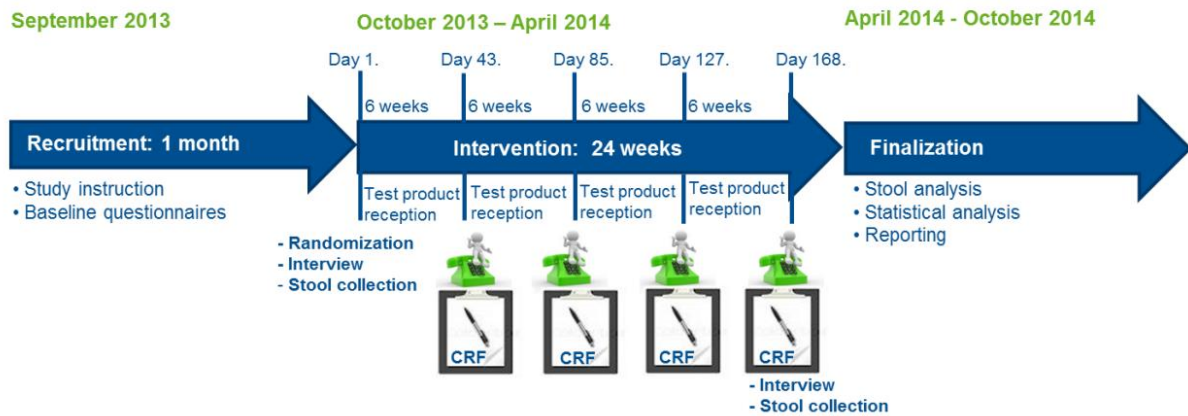

**Supplemental Figure 1.** Overview of the study design of the randomized controlled double-blind explorative study investigating the effect of prebiotic inulin-type fructans on acute infectious diseases in children
